# Supplementary material
Source: publisher figshare collection journal article supplement (https://gsapubs.figshare.com/ndownloader/files/23305670)
Supplement: Supplementary file 1 [file 23305670]

**GSA Data Repository 2017316**

**Effects of secondary phases on crystallographic preferred orientations in mylonites**

Andrew J. Cross

*Department of Earth & Planetary Sciences, Washington University in St. Louis, 1 Brookings Drive, St. Louis, MO 63130*

Greg Hirth

*Department of Geological Sciences, Brown University, 324 Brook Street, Providence, RI 02912*

David J. Prior

*Department of Geology, University of Otago, 360 Leith Street, Dunedin 9056, New Zealand*

**Table DR1:** Experimental conditions and results

| Run no.              | Piston type | Experiment duration (hours) | Finite shear strain, $\gamma^*$ | Max. sample thickness (mm) | Thinning factor <sup>†</sup> | Peak stress (MPa) | Stress at $\gamma = 1$ (MPa) <sup>§</sup> |
|----------------------|-------------|-----------------------------|---------------------------------|----------------------------|------------------------------|-------------------|-------------------------------------------|
| <u>Quartz</u>        |             |                             |                                 |                            |                              |                   |                                           |
| W1915                | Planar      |                             |                                 | Hydrostatic hot press      |                              |                   |                                           |
| W1873                | Planar      | 30                          | 1.4                             | 1.3                        | N/A                          | 747               | 280                                       |
| W1903                | Tabular     | 55                          | 2.8                             | 1.4                        | 2.0                          | 583               | 300                                       |
| W1905                | Cylindrical | 53                          | 2.6                             | 1.4                        | 1.9                          | 375               | 255                                       |
| <u>Quartz-albite</u> |             |                             |                                 |                            |                              |                   |                                           |
| W1915                | Planar      |                             |                                 | Hydrostatic hot press      |                              |                   |                                           |
| W1909                | Planar      | 31                          | 1.0                             | 1.4                        | 2.0                          | 298               | ~150                                      |
| W1914                | Tabular     | 40                          | 1.4                             | 1.6                        | 2.0                          | 443               | ~110                                      |
| W1917                | Cylindrical | 52                          | 2.7                             | 1.1                        | 2.0                          | 150               | 134                                       |
| W1919                | Cylindrical | 45                          | 2.6                             | 1.1                        | 2.1                          | 161               | 143                                       |
| W1921                | Tabular     | 56                          | 2.7                             | 1.3                        | 2.0                          | 690               | 188                                       |
| W1924                | Tabular     | 49                          | 1.8                             | 1.4                        | 2.0                          | 553               | 91                                        |

\* Measured at the thickest part of each sample (i.e., either side of the piston asperity)

<sup>†</sup> Maximum thickness of sample/ minimum thickness of sample

<sup>§</sup> Stresses marked with “~” are taken from the last point before strengthening due to friction effects

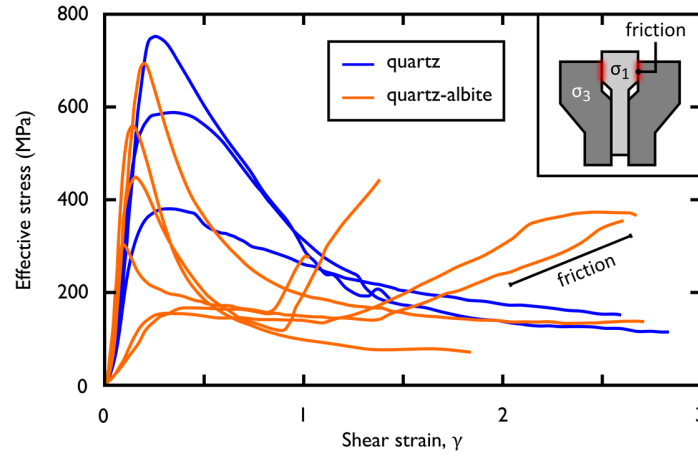

**Fig. DR1:** Mechanical data from our 9 deformation experiments. Shear strains are those measured in the thickest part of the sample (i.e., either side of the piston asperity). Effective stress is derived from raw force data, corrected for the compliance of the apparatus, but not for changes in the load-supporting area. In some experiments, stress increased beyond a shear strain of  $\sim 1$  due to friction between the  $\sigma_1$  and  $\sigma_3$  pistons. This did not impede the advancement of the  $\sigma_1$  piston, since measured finite shear strains were consistent with the finite  $\sigma_1$  displacement.

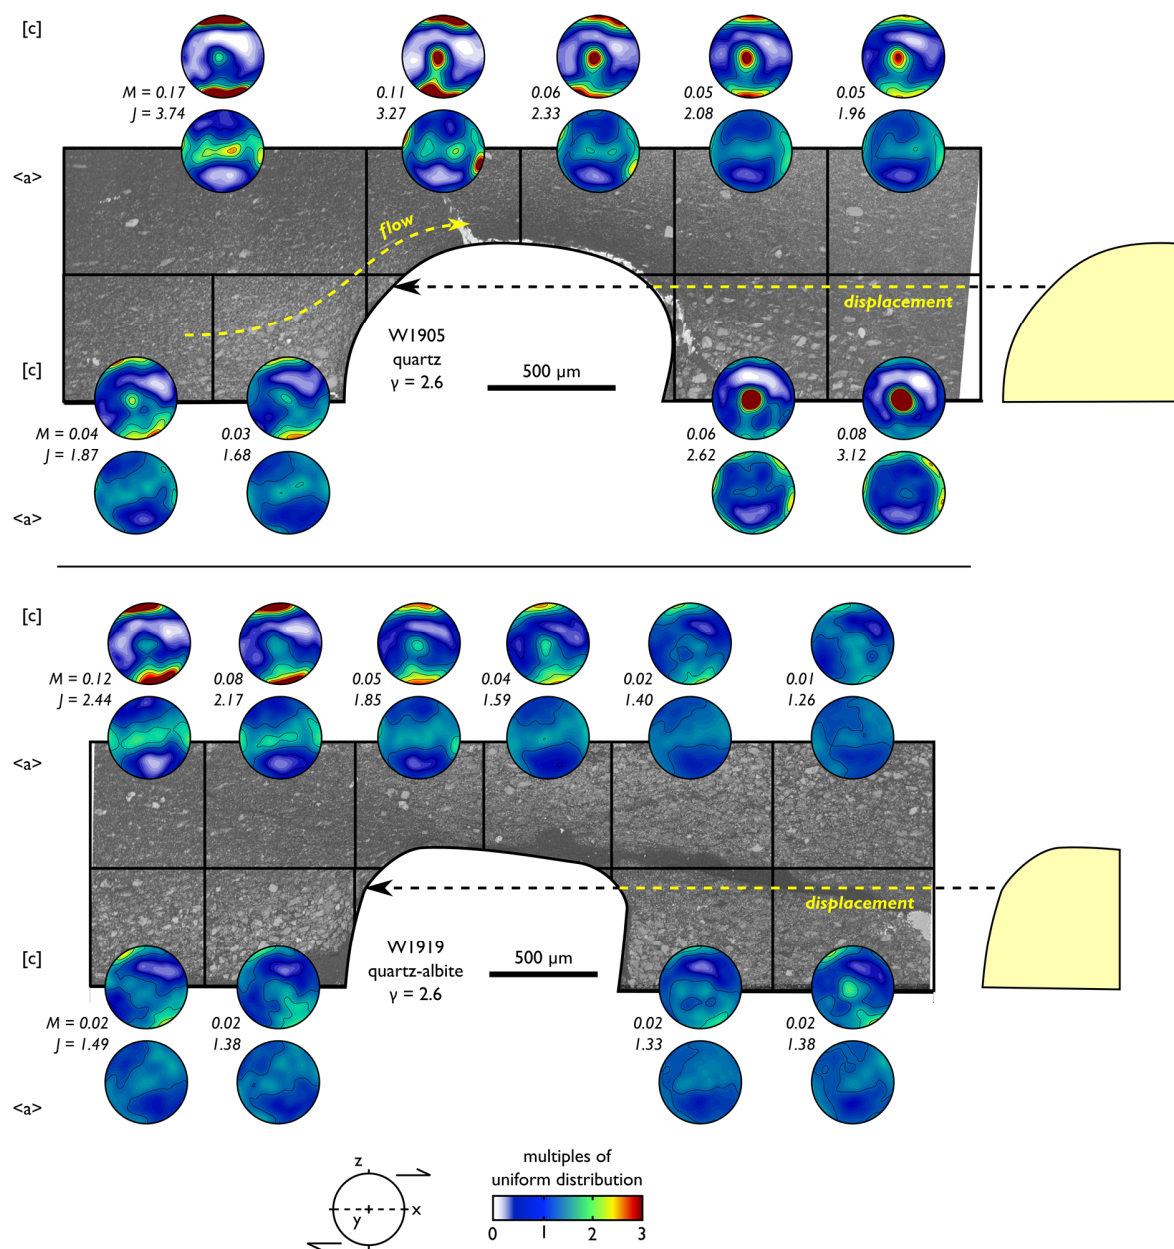

**Fig. DR2:** Evolution of quartz [c] and <a> axes during shear of quartz (top panel) and quartz with 25 vol.% albite (bottom panel) around a cylindrical piston asperity. Pole figures are constructed in the same manner as Fig. 3.

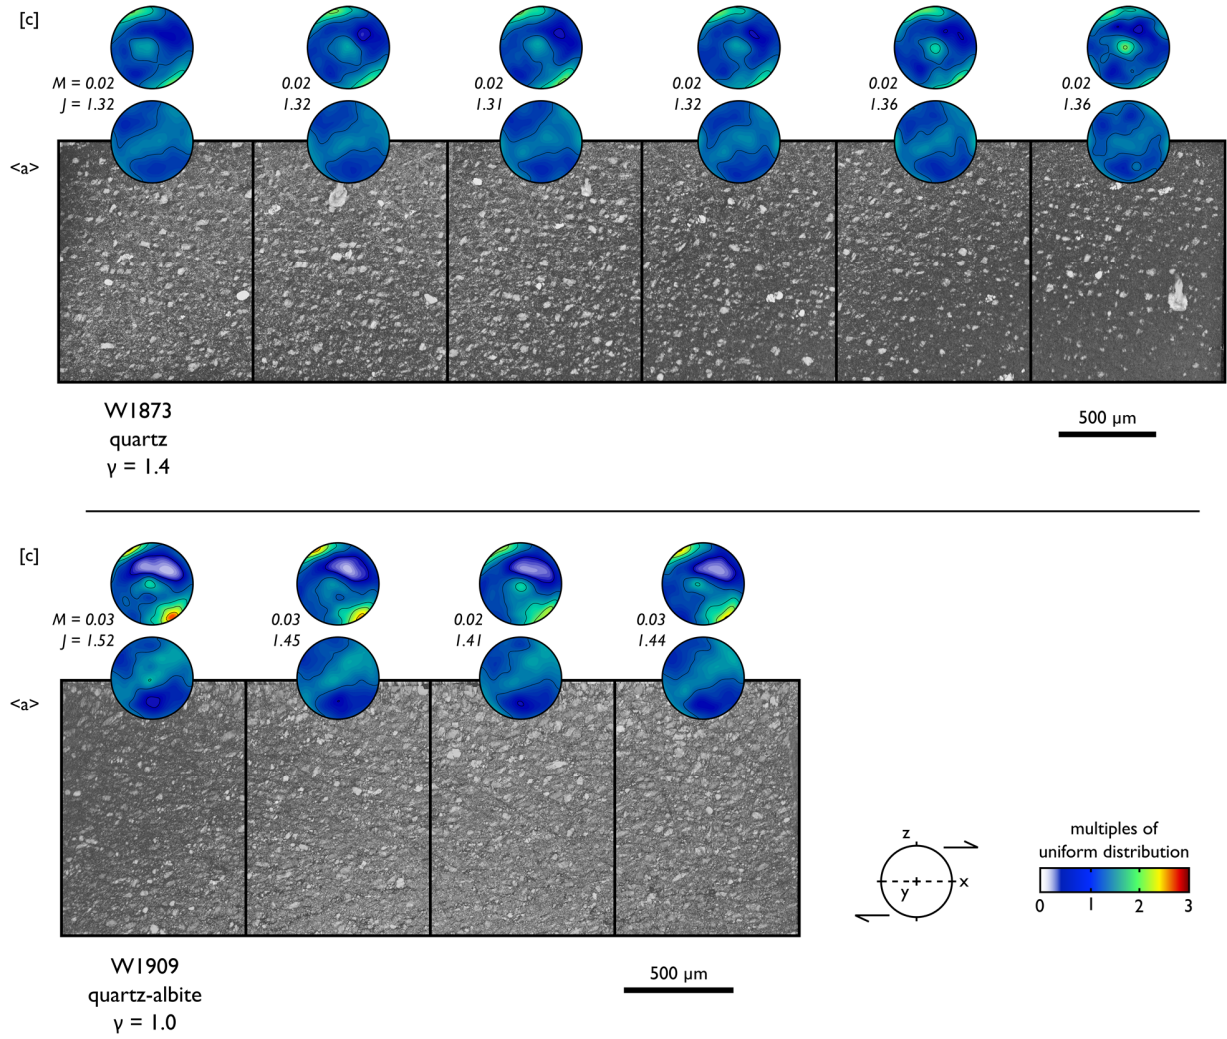

**Fig. DR3:** Evolution of quartz [c] and  $\langle a \rangle$  axes during shear of quartz (top panel) and quartz with 25 vol.% albite (bottom panel) using planar pistons. Pole figures are constructed in the same manner as Fig. 3. Note that shear strains (and therefore CPO intensities) in these experiments are lower than those in the asperity experiments. However, similar CPOs can be seen:  $y_{\max}$  dominated [c]-axes in the quartz experiments,  $z_{\max}$  dominated [c]-axes in the quartz-albite experiments.

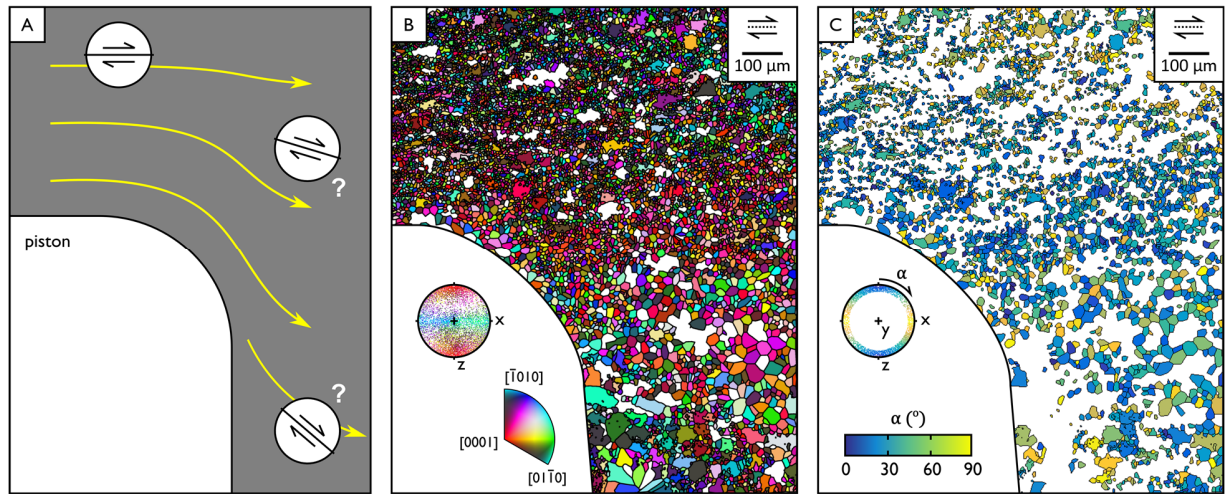

**Fig. DR4:** A) Material flow paths are modified around piston asperity corners, and may be responsible for CPO rotation. B) Map of quartz grains (quartz-albite sample W1921), colored by their orientation with respect to the pole to shear plane (z-direction). C) quartz grains within  $20^\circ$  of the x-z plane, colored by the angle,  $\alpha$ , between their [c]-axis and the z-direction. There is no clear systematic rotation of [c]-axis during shear around the piston asperity corner.
